# Supplementary material for: Shear-structured MoNb6O18 as a new anode for lithium-ion batteries
Source: Royal Society of Chemistry journal article supplement (doi:10.1039/d1ma00590a), 2021-01-01
Supplement: d1ma00590a1.pdf [file d1ma00590a1.pdf]

## Electronic Supporting Information

### Shear-structure $\text{MoNb}_6\text{O}_{18}$ as New Anode for Lithium Ion Batteries

Jialin Cheng, Fengqi Lu,\* and Xiaojun Kuang

Key Laboratory of New Processing Technology for Nonferrous Metal & Materials, Ministry of Education Guangxi Key Laboratory of Optical and Electronic Materials and Devices College of Materials Science and Engineering, Guilin University of Technology, Guilin 541004, P. R. China.

E-mail: [lufengqi@glut.edu.cn](mailto:lufengqi@glut.edu.cn)

## Experimental

The  $\text{MoNb}_6\text{O}_{18}$  sample was prepared with a conventional solid-state reaction method. In brief,  $\text{MoO}_3$  (99.5 %) and  $\text{Nb}_2\text{O}_5$  (99.99 %) were mixed with molar ratio of 3:2 in an agate mortar with pestle in absolute ethanol for two hours. The mix-oxides was pressed into a pellet with a diameter of 25 mm at 2 MPa, and preheated in a crucible on platinum sheet at 600 °C for 6 h with a heating rate of 5 °C/min. After cooling down to room temperature, the pellet was re-grounded for one hour in absolute ethanol, and then pressed into a pellet (~ 0.6 g) with a diameter of 10 mm at 6 MPa, followed by heating in a crucible with platinum sheet in air at 1000 °C for 6 h a rate of 5 °C/min.

The X-ray diffraction (XRD) patterns were collected on a PANalytical Empyrean X-ray diffractometer equipped with Cu-K $\alpha$  radiation. The morphology and microstructure of the samples were recorded by using GeminiSEM 300 field emission scanning electron microscope (FESEM) and an JEM2010-HR transmission electron microscope (TEM). The content of elements was analyzed on PerkinElmer Optima 8000 inductively coupled plasma (ICP) optical emission spectrometer.

The electrochemical performance was carried out in CR2032 coin-type cells. The working electrode was prepared mixing 80 wt% active material, 10 wt% conductive carbon, 10 wt% polyvinylidene difluoride binder in N-methyl pyrrolidone. The obtained slurry was pasted on Al foil and dried under vacuum at 100 °C for 12 h. The mass loading of active materials ( $\text{MoNb}_6\text{O}_{18}$ ) in the composite electrode was 2~3 mg/cm<sup>2</sup>. CR2032-type coin cells were assembled in a glove box filled with argon. Li foil was used as the counter and reference electrode. A polypropylene microporous film (Celgard 2400) was used as the separator. 1 M  $\text{LiPF}_6$  solution in a mixture solvent of ethylene carbonate and dimethyl carbonate (1:1, v/v) was used as electrolyte. The galvanostatic charge-discharge (GCD) measurements were measured by using a Neware CT-3008-5V5mA battery testing system. Cyclic voltammetry (CV) and electrochemical impedance spectra (EIS) were performed by using a Chenhua CHI760E Electrochemical Workstation. The full cell was fabricated with  $\text{MoNb}_6\text{O}_{18}$  as the anode and commercial  $\text{LiMn}_2\text{O}_4$  (MTI-Shenzhen Kejing Star) as the cathode, denoted for LMO//MNO. The galvanostatic charge-discharge (GCD) measurements of

the LMO//MNO full cells were measured in the voltage range of 1.0-3.2 V at 0.2 C. The capacity of LMO//MNO full cell was calculated based on the mass of MNO anode.

Based on two-electron transfer per transition metal ion, the theoretical capacity ( $C_0$ ) of  $\text{MoNb}_6\text{O}_{18}$  was 399 mAh/g and calculated by:

$$C_0 = \frac{nF}{3.6M} = \frac{14 \times 96485}{3.6 \times 941} \approx 399 \text{ mAh/g}$$

Where  $n$  is the number of electrons transferred per formula unit,  $F$  is Faraday constant (96485 C/mol), 3.6 is a conversion factor between coulombs and the conventional milliamper-hour, and  $M$  is the molar mass in per formula unit. So, 1 C is defined as 399 mA/g in this work.

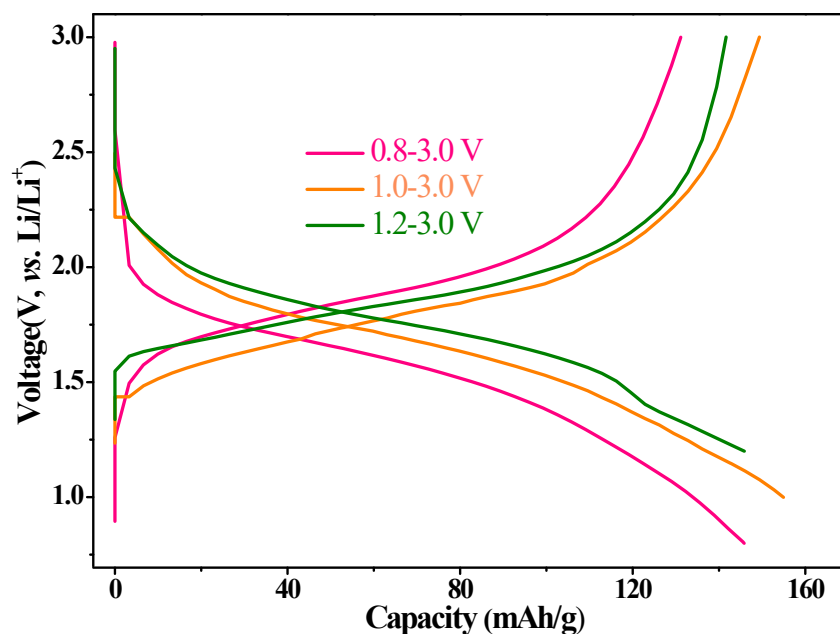

**Fig. S1.** Initial discharge-charge voltage profiles of MoNb<sub>6</sub>O<sub>18</sub> at 1 C.

**Table S1.** Comparison of the MNO electrode with reported Nb-based and other anode electrodes in previous literature in terms of capacity and rate capability.

| Composition                                       | Morphology             | Current density         | Initial discharge/charge capacity (mAh/g), initial CE | Discharge capacity (mAh/g)                                      | Ref.      |
|---------------------------------------------------|------------------------|-------------------------|-------------------------------------------------------|-----------------------------------------------------------------|-----------|
| MoNb <sub>12</sub> O <sub>33</sub>                | porous microspheres    | 0.1C                    | 351/321, 91.5%                                        | 275, 1C<br>100 cycles                                           | 24        |
| MoNb <sub>12</sub> O <sub>33</sub>                | micron-sized particles | 0.1C                    | 349/294, 84.2%,                                       | 210, 1C<br>100 cycles                                           | 24        |
| Mo <sub>3</sub> Nb <sub>14</sub> O <sub>44</sub>  | nanowires              | 0.1 C                   | 321/288.9, 90%                                        | 140, 10C<br>1000 cycles                                         | 26        |
| Mo <sub>3</sub> Nb <sub>14</sub> O <sub>44</sub>  | micron-sized particles | 0.1 C                   | 323/2987.8, 92.2%                                     | 95, 10C<br>1000 cycles                                          | 26        |
| SiO/Ti <sub>3</sub> C <sub>2</sub> T <sub>x</sub> | nanocomposite          | 200 mA/g                | 1986.7/1378.8, 69.4%                                  | 750, 1A/g<br>120 cycles                                         | 5         |
| Nb <sub>2</sub> O <sub>5</sub>                    | nanorods               | 50 mA/g                 | 305/294, 97.3%                                        | 160, 100mA/g<br>270 cycles                                      | 20        |
| SnO <sub>2</sub> //CC                             | Nano-sized             | 0.15 mA/cm <sup>2</sup> | 4.38/3.1 mAh/cm <sup>2</sup> , 70.8%                  | 1.69 mAh/cm <sup>2</sup><br>1.5 mA/cm <sup>2</sup> , 500 cycles | 34        |
| MoNb <sub>6</sub> O <sub>18</sub>                 | micron-sized particles | 0.2 C                   | 219.3/212.4, 96.8%                                    | 142.3, 1 C<br>60 cycles                                         | This work |

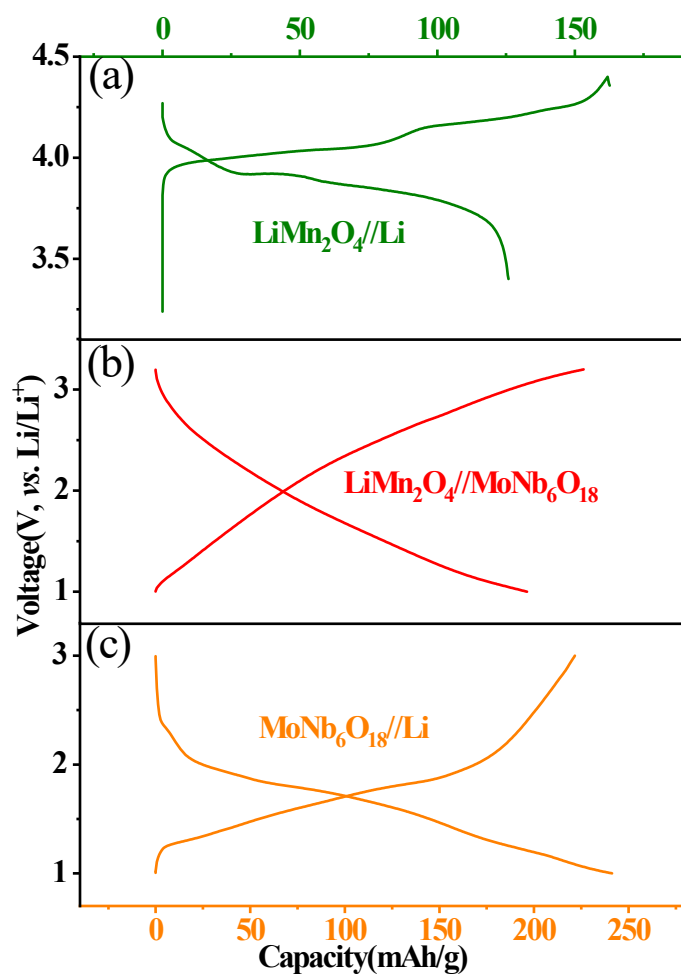

**Fig. S2.** Charge-discharge profiles of (a) LiMn<sub>2</sub>O<sub>4</sub>//Li half cell, (b) LiMn<sub>2</sub>O<sub>4</sub>//MoNb<sub>6</sub>O<sub>18</sub> full cell, (c) MoNb<sub>6</sub>O<sub>18</sub>//Li half cell at 0.2 C.

Based on the charge capacity of LMO cathode and the discharge capacity of MNO anode, the mass ratio was 1.5 : 1 ( $\text{mass}_{\text{cathode}} : \text{mass}_{\text{anode}} = 1.5 : 1$ ).
